# Supplementary material for: Controlled oxidation of V 2 O 5 /VO 2 hollow nanospheres as photocathodes for photo-rechargeable zinc ion batteries with an ultrahigh capacity enhancement
Source: Royal Society of Chemistry journal article supplement (doi:10.1039/d5ta00517e), 2025-01-01
Supplement: d5ta00517e1.pdf [file d5ta00517e1.pdf]

## Electronic supplementary information

### **Controlled oxidation of $V_2O_5/VO_2$ hollow nanospheres as photocathodes for photo-rechargeable zinc ion batteries with an ultrahigh capacity enhancement**

Hongran Yang,<sup>a</sup> Shilei Wu,<sup>a</sup> Akesh Manimendra Badalge,<sup>c</sup> Xinyu Li,<sup>c</sup>

Qianjin Wang,<sup>ab</sup> Yu Lin Zhong,<sup>c</sup> and Ting Zhu<sup>ab\*</sup>

<sup>a</sup> School of Physics and Electronic Information, Yunnan Normal University, 768 Juxian Street, Kunming 650500, China.

<sup>b</sup> Yunnan Key Laboratory of Optoelectronic Information Technology, School of Physics and Electronic Information, Yunnan Normal University, Kunming 650500, China.

<sup>c</sup> School of Environment and Science, Griffith University, Nathan, QLD 4111, Australia.

\*Emails: zhut0002@ynnu.edu.cn (T. Zhu)

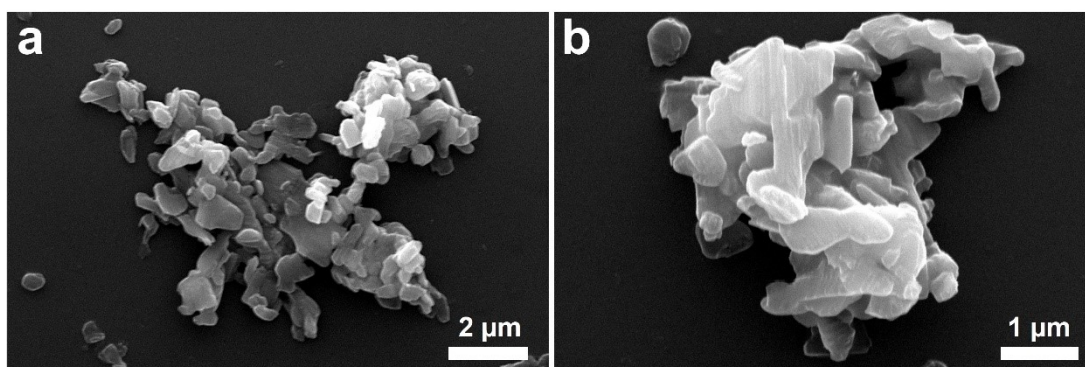

**Fig. S1.** SEM images of the starting commercial  $\text{V}_2\text{O}_5$  particles.

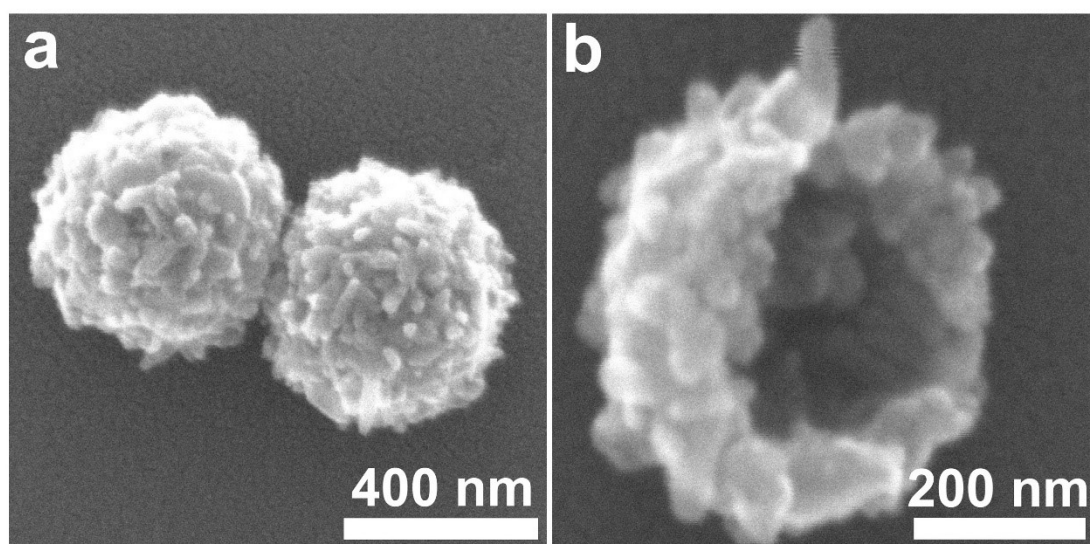

**Fig. S2.** SEM images of the intermediate  $\text{VO}_2$  particles.

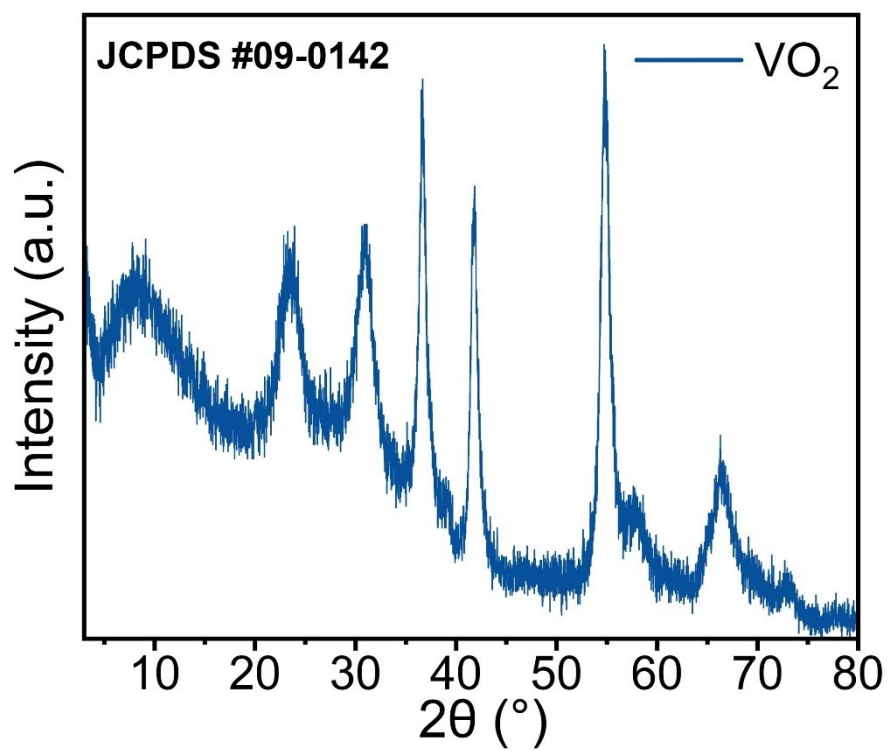

**Fig. S3.** XRD pattern of the intermediate  $\text{VO}_2$  particles.

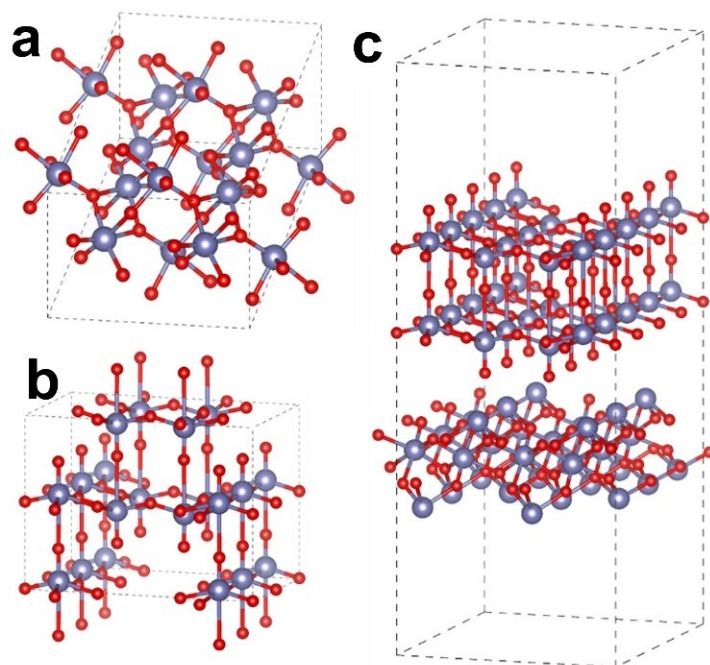

**Fig. S4.** The optimized models of  $\text{VO}_2$  (a),  $\text{V}_2\text{O}_5$  (b), and  $\text{V}_2\text{O}_5/\text{VO}_2$  (c).

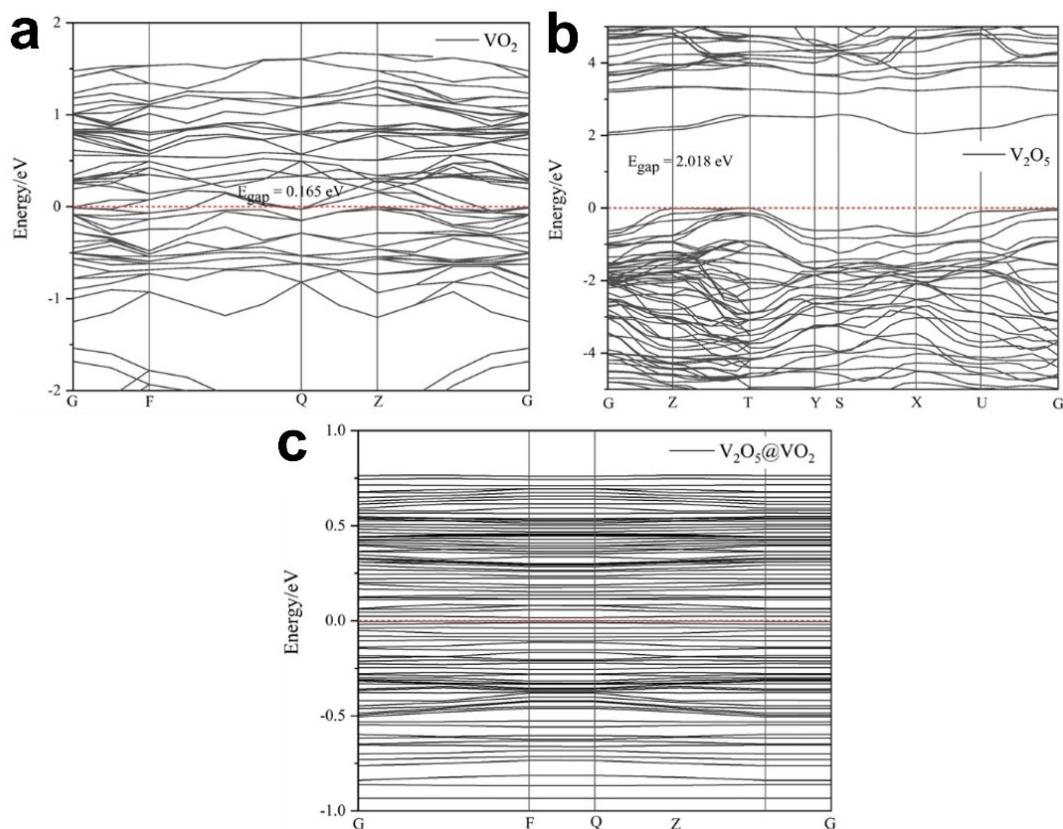

**Fig. S5.** The band structures of  $\text{VO}_2$  (a),  $\text{V}_2\text{O}_5$  (b), and  $\text{V}_2\text{O}_5/\text{VO}_2$  (c).

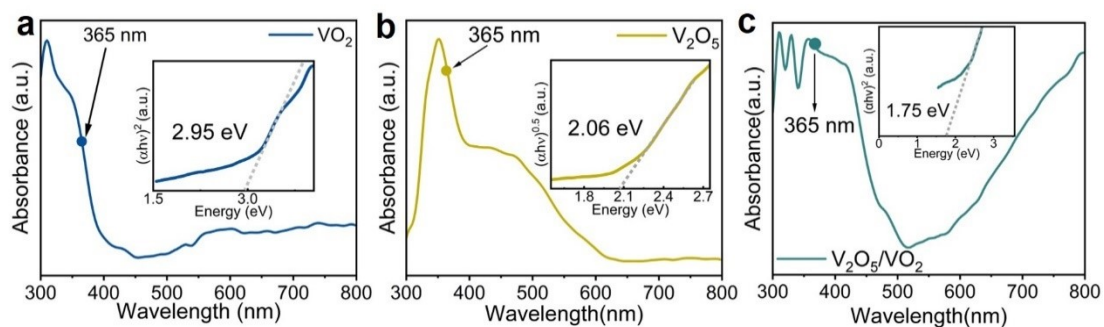

**Fig. S6.** UV-vis spectra of the intermediate  $\text{VO}_2$  particles (a),  $\text{V}_2\text{O}_5$  by a complete conversion from the intermediate  $\text{VO}_2$  (b), and the final  $\text{V}_2\text{O}_5/\text{VO}_2$  hollow nanospheres.



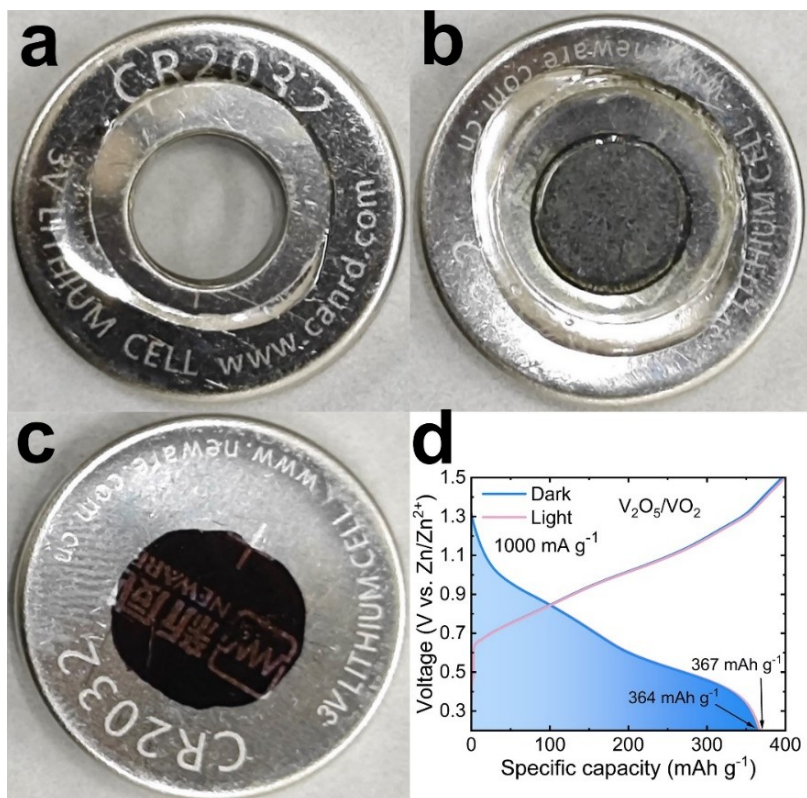

**Fig. S7.** The modified CR2032 coin cell with a PET transparent film in the punched hole (a), a ZIB full coin cell employing  $V_2O_5/VO_2$  as cathode and Zn foil as anode (b), the ZIB coin cell with PET film filled in black using a mark pen (c), charge-discharge curves obtained with/without light irradiation of the ZIB coin cell in (c) to show the photothermal effect on electrochemical performances (d).

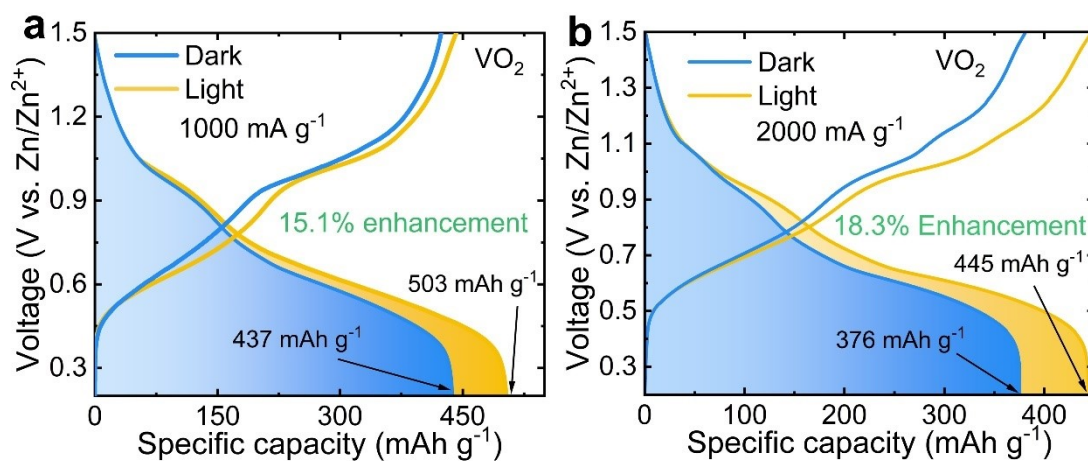

**Fig. S8.** Charge-discharge curves obtained with/without light irradiation at a current density of 1000 (a) and 2000  $mA\ g^{-1}$  (b) of the intermediate  $VO_2$  sample.

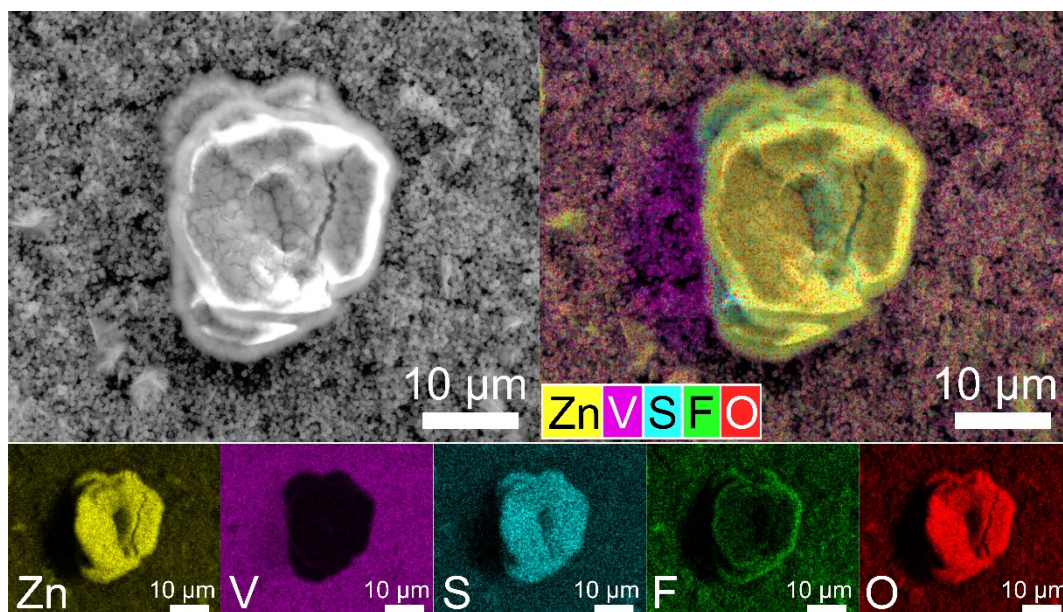

**Fig. S9.** SEM and EDX mapping of the  $\text{V}_2\text{O}_5/\text{VO}_2$  cathode after 500 cycles at  $5 \text{ A g}^{-1}$ .

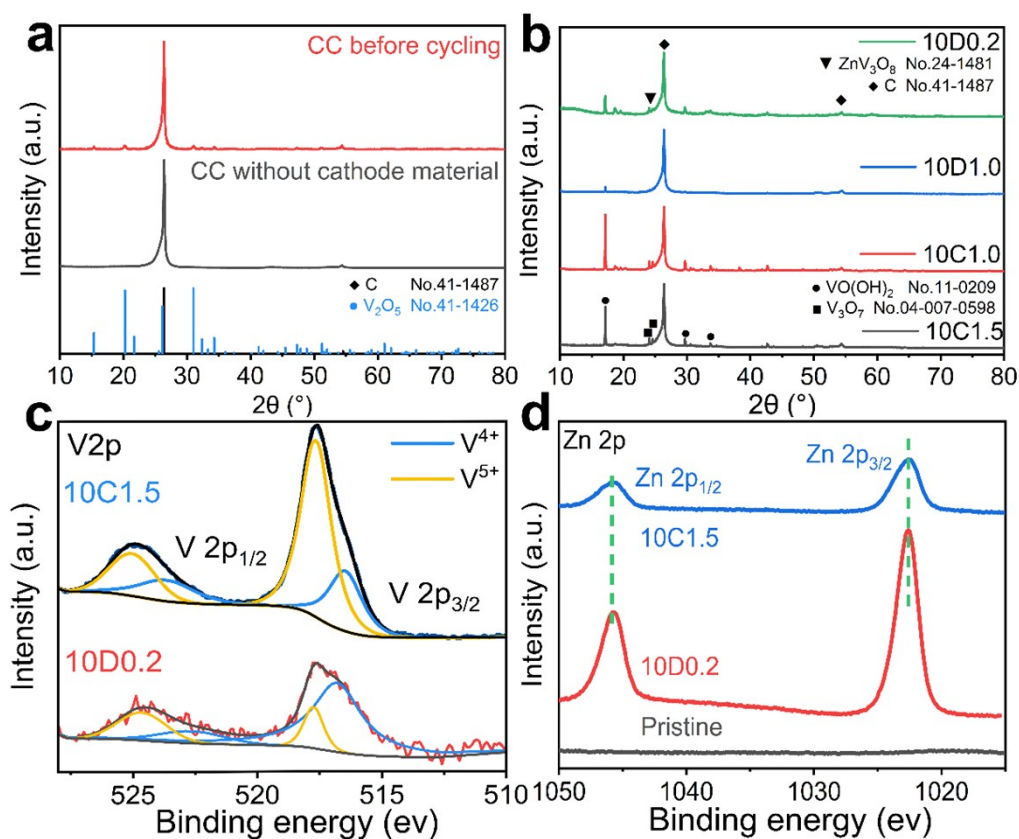

**Fig. S10.** XRD patterns (a and b) and XPS spectra (c and d) of the CC and the  $\text{V}_2\text{O}_5/\text{VO}_2$  loaded CC electrodes before cycling (a),  $\text{V}_2\text{O}_5/\text{VO}_2$  loaded CC electrodes cycled for 10 times, at which the ZIB cells were discharged to 1 V and 0.2 V, and recharged to 1 V and 1.5 V, respectively (b), V 2p (c) and Zn 2p (d) spectra of the  $\text{V}_2\text{O}_5/\text{VO}_2$  loaded CC cycled for 10 times, at which the ZIB cells were charged to 1.5 V and discharged to 0.2 V, respectively.

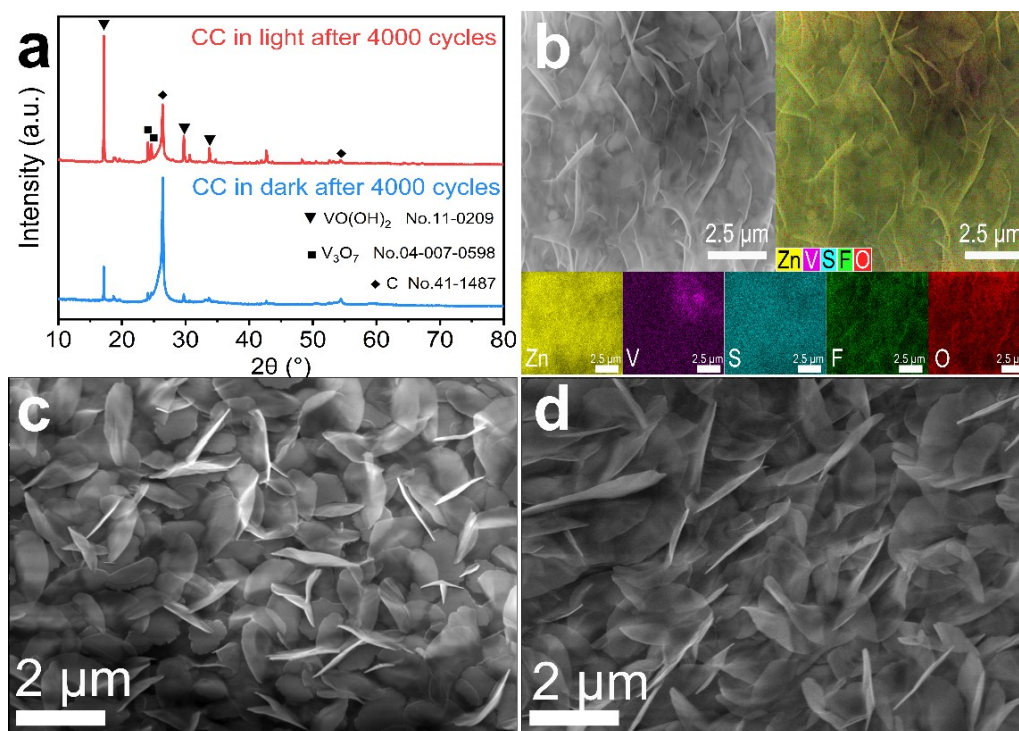

**Fig. S11.** XRD patterns (a), SEM and EDX images (b-d) of the  $V_2O_5/VO_2$  loaded CC cathodes after 4000 cycles under dark and light conditions, respectively.

**Table S1.** A summary of the important parameters and performance of the recently

| Cathode materials                                                        | Battery system | Current density /mA g <sup>-1</sup> | Discharge capacity (dark)/mAh g <sup>-1</sup> | Light enhancement | Cycling performance                            | Light source  | Conversion efficiency (η) |
|--------------------------------------------------------------------------|----------------|-------------------------------------|-----------------------------------------------|-------------------|------------------------------------------------|---------------|---------------------------|
| <b>This work</b>                                                         | ZIBs           | 200                                 | 441.8                                         | 77.8%             | 200 mA g <sup>-1</sup> for 500 cycles /84.6%   | 365 nm        | 4.3%                      |
| VO <sub>2</sub> /ZnO <sup>[1]</sup>                                      | ZIBs           | 200                                 | 367                                           | 17.7%             | 200 mA g <sup>-1</sup> for 500 cycles /73%     | 455 nm        | 0.51%                     |
| VO <sub>2</sub> /rGO <sup>[2]</sup>                                      | ZIBs           | 200                                 | 282                                           | 11.7%             | 1000 mA g <sup>-1</sup> for 1000 cycles /90.0% | 455 nm        | 0.18%                     |
| V <sub>2</sub> O <sub>5</sub> /P3HT/rGO <sup>[3]</sup>                   | ZIBs           | 1000                                | 103                                           | 33.0%             | /                                              | 455 nm        | 1.2%                      |
| MoS <sub>2</sub> /ZnO <sup>[4]</sup>                                     | ZIBs           | 100                                 | 245                                           | 38.7%             | 500 mA g <sup>-1</sup> for 200 cycles /82%     | 455 nm        | 1.8%                      |
| MoS <sub>2</sub> /C-NT <sup>[5]</sup>                                    | ZIBs           | 100                                 | 254                                           | 39.7%             | 500 mA g <sup>-1</sup> for 1000 cycles /70%    | 1 sun         | 0.98%                     |
| MoS <sub>2</sub> /SnO <sub>2</sub> <sup>[6]</sup>                        | ZIBs           | 100                                 | 190                                           | 92.6%             | /                                              | 1 sun         | 2.7%                      |
| V <sub>2</sub> O <sub>5</sub> <sup>[7]</sup>                             | ZIBs           | 100                                 | 281                                           | 68.5%             | 5000 mA g <sup>-1</sup> for 4000 cycles /89.3% | 450 nm        | 5.2%                      |
| SnO <sub>2</sub> /MnO <sub>2</sub> <sup>[8]</sup>                        | ZIBs           | 200                                 | 333                                           | 56.4%             | 1000 mA g <sup>-1</sup> for 500 cycles /90.0%  | 1 sun         | 1.2%                      |
| TiO <sub>2</sub> /CuTPP /Cu:V <sub>2</sub> O <sub>5</sub> <sup>[9]</sup> | ZIBs           | 100                                 | 210                                           | 27.6%             | /                                              | 1 sun         | 5.51%                     |
| V <sub>2</sub> O <sub>5</sub> /P3HT/rGO <sup>[10]</sup>                  | LIBs           | 200                                 | 118                                           | 36.4%             | /                                              | 455 nm /1 sun | 2.6% /0.22%               |
| V <sub>2</sub> O <sub>3</sub> @CSs <sup>[11]</sup>                       | ZIBs           | 500                                 | 305                                           | 51.8%             | 2000 mA g <sup>-1</sup> for 300 cycles /90%    | 550nm         | 0.354%                    |
| MoSe <sub>2</sub> -VSe <sup>[12]</sup>                                   | ZIBs           | 100                                 | 186.2                                         | 26.0%             | 500 mA g <sup>-1</sup> for 100 cycles /63.0%   | 1 sun         | 0.58%                     |



## References

- [1] Deka Boruah B, De Volder M. Vanadium dioxide–zinc oxide stacked photocathodes for photo-rechargeable zinc-ion batteries [J]. *Journal of Materials Chemistry A*, 2021, 9(40): 23199-23205.
- [2] Deka Boruah B, Mathieson A, Park S K, et al. Vanadium Dioxide Cathodes for High-Rate Photo-Rechargeable Zinc-Ion Batteries [J]. *Advanced Energy Materials*, 2021, 11(13): 2100115.
- [3] Boruah B D, Mathieson A, Wen B, et al. Photo-rechargeable zinc-ion batteries [J]. *Energy & Environmental Science*, 2020, 13(8): 2414-2421.
- [4] Boruah B D, Wen B, De Volder M. Molybdenum Disulfide–Zinc Oxide Photocathodes for Photo-Rechargeable Zinc-Ion Batteries [J]. *ACS Nano*, 2021, 15(10): 16616-16624.
- [5] Cao M, Wang D, Feng Y, et al. Design of a light-sensitive tubular MoS<sub>2</sub>/C composite as the cathode for photo-enhanced rechargeable zinc-ion batteries [J]. *Journal of Materials Chemistry A*, 2024, 12(10): 5924-5930.
- [6] Wen X, Zhong Y, Chen S, et al. 3D Hierarchical Sunflower-Shaped MoS<sub>2</sub>/SnO<sub>2</sub> Photocathodes for Photo-Rechargeable Zinc Ion Batteries [J]. *Advanced Science*, 2024, 11(21): 2309555.
- [7] Zha W, Ruan Q, Ma L, et al. Highly Stable Photo-Assisted Zinc-Ion Batteries via Regulated Photo-Induced Proton Transfer [J]. *Angew Chem Int Ed Engl*, 2024, 63(15): e202400621.
- [8] Gao X, Tian D, Shi Z, et al. An Efficient MnO<sub>2</sub> Photocathode with an Excellent SnO<sub>2</sub> Electron Transport Layer for Photo-Accelerated Zinc Ion Batteries [J]. *Small*, n/a(n/a): 2405627.
- [9] Naskar S, Maity D, Dixit A, et al. A Förster resonance energy transfer enabled photo-rechargeable battery with an energetically misaligned Cu-porphyrin dye/Cu:V<sub>2</sub>O<sub>5</sub> photocathode [J]. *Journal of Materials Chemistry A*, 2024, 12(25): 15203-15226.
- [10] Boruah B D, Wen B, De Volder M. Light Rechargeable Lithium-Ion Batteries Using V<sub>2</sub>O<sub>5</sub> Cathodes [J]. *Nano Letters*, 2021, 21(8): 3527-3532.
- [11] Zhao Y, He T, Li J, et al. Carbon Superstructure-Supported Half-Metallic V<sub>2</sub>O<sub>3</sub> Nanospheres for High-Efficiency Photorechargeable Zinc Ion Batteries [J]. *Angewandte Chemie International Edition*, 2024, 63(38): e202408218.
- [12] Chen X, Zhang A, Zou H, et al. Defect engineering modulated MoSe<sub>2</sub> cathode achieves highly effective photo-responsive zinc ion battery [J]. *Energy Storage Materials*, 2024, 70: 103457.
